# Supplementary material for: Spatiotemporal relationships of threatened cetaceans and anthropogenic threats in the lower Yangtze system
Source: Frontiers journal article supplement (doi:10.3389/fcosc.2022.929959), 2022-11-02
Supplement: Data_Sheet_1.docx [file Data_Sheet_1.docx]

**Questionnaire**

Date: D_______/M_______/Y________ Interviewer: _____________________________

Location: _________________________________________________________________________

Village: ______________ County: _____________ City: _____________ Province: ______________

Interviewee ID: ____________________________________________________________________

Start Time: _________________ End Time: __________________

**Opening statement**: This survey is looking into the health of fish stock populations, quality of habitat in the Yangtze, and status of the porpoise in the river. This survey is very important to help protect the river and its species. Your participation in this research is voluntary and confidential. We record the name of the village but not of individuals. You do not have to answer any questions if you do not feel comfortable. If you do not know an answer, please say ‘I do not know’ – it is fine if you do not know the answer. There are lots of questions but each one is very important so please be as accurate as you can.

You should know that you are able to withdraw from the interview at any time without having to give the reason why.

1. Are you willing to participate in this survey? Yes Unwilling, No

***PERSONAL***

1. Personal Details
   1. Age _______________
   2. Are you a fisherman currently? Yes No, I was but I’m retired now
      1. If RETIRED what year did you retire? __________________________________
      2. If CURRENT fisher, how many years have you been a fisher? _______________
   3. Have you always been a fisher in **this** region? **YES** **NO**
      1. If **NO**, where did you fish before? ______________________________
      2. If **NO**, when did you move to this region? ________________________
   4. Where do you normally go fishing? (give rough location(s) or direction) ________________________________________________________________________
   5. What are the upstream and downstream limits of where you go fishing (approx.)?

________________________________________________________________________

- 1. How many fishing boats does your family you own? 1 2 3 4 or more

How many do you use for fishing yourself? ____________________________________

- 1. Please identify the type of boat(s) you own from the pictures –

Type 1 Type 2 Type 3 Other

Primary boat

Secondary boat

Tertiary boat

***FISHING TYPE QUESTIONS***

1. What type of fishing equipment do you use at the moment? **[TICK ALL THAT APPLY]**

**Order of use (1st, 2nd,3rd)**

Si Wang _______________

Xia Long - shrimp _______________

Feng wang - drag net _______________

Wei Wang - large circular drift net _______________

Tuo Wang - Drag net _______________

Sancenwang - 3 layered gill net _______________

Hao Wang _______________

Xie Wang - crab net _______________

Gungou - rolling hooks _______________

Dian Wang - electric fishing _______________

Ai Wei - semi-permanent low wall moat _______________

Ding Zhe Wang - set net _______________

Du Yu - poison _______________

Other (specify) ______________________________________

1. **PRIMARY FISHING METHOD:** Most used - equipment type 1 (name): ____________________
   1. Mesh size: ____________(mm)
   2. Size/length of net: _____________(m)
   3. Where used in the channel: Centre Bank
   4. Water depth: ________(m)
   5. Where it’s used (location in lake/river i.e. town/village): _____________________
   6. Time of day/night: ________am/pm to _________ am/pm
   7. Hours per day: ___________/day
   8. Days per week: ____________/week
   9. Number of hours/days equipment is left in the water (soak time): _______hours/days
   10. Is the equipment: Attended Unattended
   11. Month start – month finish (please circle **ALL** months used):

Jan Feb Mar Apr May Jun Jul Aug Sep Oct Nov Dec

- 1. Target species: _______________________________________________________
  2. Why do you use this equipment type as opposed to others? ____________________________________________________________________
  3. Proportion of income from this equipment type: ____________(%)

1. **SECONDARY FISHING METHOD**: Fishing equipment type 2: ____________________________
   1. Mesh size: ____________(mm)
   2. Size/length of net: _____________(m)
   3. Where used in the channel: Centre Bank
   4. Water depth: ________(m)
   5. Where it’s used (location in lake/river i.e. town/village): _____________________
   6. Time of day/night: ________am/pm to _________ am/pm
   7. Hours per day: ___________/day
   8. Days per week: ____________/week
   9. Number of hours/days equipment is left in the water (soak time): _______hours/days
   10. Is the equipment: Attended Unattended
   11. Month start – month finish (please circle **ALL** months used):

Jan Feb Mar Apr May Jun Jul Aug Sep Oct Nov Dec

- 1. Target species: _______________________________________________________
  2. Why do you use this equipment type as opposed to others? ____________________________________________________________________
  3. Proportion of income from this equipment type: ____________(%)

1. **Fishing equipment type 3**: ____________________________
   1. Mesh size: ____________(mm)
   2. Size/length of net: _____________(m)
   3. Where used in the channel: Centre Bank
   4. Water depth: ________(m)
   5. Where it’s used (location in lake/river i.e. town/village): _____________________
   6. Time of day/night: ________am/pm to _________ am/pm
   7. Hours per day: ___________/day
   8. Days per week: ____________/week
   9. Number of hours/days equipment is left in the water (soak time): _______hours/days
   10. Is the equipment: Attended Unattended

Jan Feb Mar Apr May Jun Jul Aug Sep Oct Nov Dec

- 1. Month start – month finish (please circle **ALL** months used):
  2. Target species: _______________________________________________________
  3. Why do you use this equipment type as opposed to others? ____________________________________________________________________
  4. Proportion of income from this equipment type: ____________(%)

1. **Fishing equipment type 4**: ____________________________
   1. Mesh size: ____________(mm)
   2. Size/length of net: _____________(m)
   3. Where used in the channel: Centre Bank
   4. Water depth: ________(m)
   5. Where it’s used (location in lake/river i.e. town/village): _____________________
   6. Time of day/night: ________am/pm to _________ am/pm
   7. Hours per day: ___________/day
   8. Days per week: ____________/week
   9. Number of hours/days equipment is left in the water (soak time): _______hours/days
   10. Is the equipment: Attended Unattended
   11. Month start – month finish (please circle **ALL** months used):

Jan Feb Mar Apr May Jun Jul Aug Sep Oct Nov Dec

- 1. Target species: _______________________________________________________
  2. Why do you use this equipment type as opposed to others? ____________________________________________________________________
  3. Proportion of income from this equipment type: ____________(%)

1. What type of fishing equipment did you use **5** **years ago** (**2010**)?
   1. SAME DIFFERENT
   2. If DIFFERENT, please specify the type of gear used: _________________________
   3. If DIFFERENT, why did you change the type of fishing gear?

___________________________________________________________________

- 1. If DIFFERENT, **what year** did you change to this gear? ________________________

1. What type of fishing equipment did you use **10** **years ago** (**2005**)?
   1. SAME DIFFERENT
   2. If DIFFERENT, please specify the type of gear used: _________________________
   3. If DIFFERENT, why did you change the type of fishing gear?

___________________________________________________________________

- 1. If DIFFERENT, **what year** did you change to this gear? ________________________

1. Have you ever changed fishing method over your lifetime? **YES / NO**

**[If they’ve already said YES to Q 8and 9 above and given details there, ask them if they ever changed fishing type at any other point(s) in their life]**

If **YES**, How (from what method to what method?) ___________________________________

_____________________________________________________________________________

If **YES**, what year? ______________________________________________________________

If **YES**, Why? __________________________________________________________________

1. In the seasons when you are fishing, how many hours a day do you fish now?

Last year (2015): ____________________________________________________ hours/day

5 years ago (2010): __________________________________________________ hours/day

10 years ago (2005): _________________________________________________ hours/day

***PORPOISE QUESTIONS***

1. Do you know what a porpoise is? **YES / NO**

**THEN SHOW BAIJI AND PORPOISE PICTURES PAGE AND ASK THEM TO POINT IT OUT: A, B?**

Correct Incorrect If Incorrect, make sure they know you are talking about A

1. Have you seen a porpoise this year? **YES / NO**

If **YES**, give **date** of ***most recent*** sighting: ___________________________________________

1. **On average, how often** have you seen a porpoise when you have been on the river/lake **this year**? (av.)

____________________________**day/week/month** **[don’t accept “every day” as an answer]**

1. Have you seen a porpoise this week? **YES / NO**
2. Have you seen a porpoise this month? **YES / NO**
3. How often did you see one **5 years ago** (*X/day, X/week)?* ___________________d/w/m
4. How often did you see one **10 years ago** (*X/day, X/week)*? __________________ d/w/m
5. Do you see more porpoise at a particular time of year? **YES / NO**

If **YES,** when? *(ask for months)* _____________________________________

If **YES**, ***Why*** do you think you see them more at this time of year? __________________

1. **Where in the river/lake [delete as necessary]** do you mostly see porpoise? Describe locations:

______________________________________________________________________________

1. Where in the channel do you mostly see porpoise?

Close to the river bank (150m) Mid-channel Other: _________________

1. What water depth? Shallow (0-3m deep) Middle (5-10m deep) Deep (>10m)
2. Have you ever heard of **anyone else** (a friend or other fishermen) seeing a **dead** porpoise? **Y /N**

If **YES**, How many times a month, on average? ____________________________**month**

How many times a year, on average? ______________________________**year**

**[FOR BELOW - ASK FOR DETAILS ON THE MOST RECENT DEATHS THEY HAVE HEARD OF]**

If **YES** a. Where? ______________________

b. When? **M** ________ **D** ________ **Y**________

c. Any visible injuries? ________________________________________________

d. What do you (or they) think made the porpoise die? ____________________ **DK**

If **YES** a. Where ______________________

b. When? **M** ________ **D** ________ **Y**________

c. Any visible injuries? ________________________________________________

d. What do you (or they) think made the porpoise die? ____________________ **DK**

If **YES** a. Where? ______________________

b. When? **M** ________ **D** ________ **Y**________

c. Any visible injuries? ________________________________________________

d. What do you (or they) think made the porpoise die? ____________________ **DK**

1. Have **you** ever seen a dead porpoise? **YES/ NO** [**if there is more than one, take all details**]

If **YES**, How often do you see a dead porpoise? ___________________________**d/w/m/y**

How many times a month, on average? ____________________________**month**

How many times a year, on average? ______________________________**year**

If **YES** a. Where? ______________________

b. When? **M** ________ **D** ________ **Y**________

c. Any visible injuries? ________________________________________________

d. What do you think made the porpoise die? ___________________________ **DK**

If **YES** a. Where ______________________

b. When? **M** ________ **D** ________ **Y**________

c. Any visible injuries? ________________________________________________

d. What do you think made the porpoise die? ___________________________ **DK**

If **YES** a. Where? ______________________

b. When? **M** ________ **D** ________ **Y**________

c. Any visible injuries? ________________________________________________

d. What do you think made the porpoise die? ___________________________ **DK**

1. How many **dead** porpoise did you see in 2015? _________________ **DK**
   1. How many **dead** porpoise did you see in 2010, five years ago? _______________ **DK**
   2. How many **dead** porpoise did you see in 2005, 10 years ago? _______________ **DK**
2. Do you see **dead** porpoise more in certain seasons or months? **YES / NO / DON’T KNOW**

If **YES** a. Which months/seasons? ___________________________________________

b. Why do you think that is? _________________________________________

***Cause of porpoise decline***

1. Have you heard of **anyone else** **(a friend or other fishermen)** accidentally getting a porpoise caught in their fishing equipment in the **last 12 months**? **YES / NO**

**[Note: they may have talked about such an event above in 31, if so, write in gap below to reference that answer]**

If **YES** a. Which type of fishing equipment? _____________________________________

b. Where in the lake? _________________________________________________

c. Time of year/month? _______________________________________________

d. Alive and well, injured or dead? ______________________________________

e. If injured, in what way? _______________________________________________

f. If dead, cause of death? _______________________________________________

g. How often does entanglement happen (on average)? _________________**w/m/y**

h. How often have you heard of someone getting a porpoise in their fishing equipment? In the last month? ________________________

In the last year? ________________________

In the last 5 years? ________________________

1. Have **you** caught a porpoise in any of your fishing equipment in the **last 12 months?** **Y / N**

If **YES** a. Which equipment? ___________________________________________

b. Where in the river/lake? ______________________________________________

c. Time of year/month? _________________________________________________

d. Alive and well, injured or dead? ________________________________________

e. If injured, in what way? _______________________________________________

f. If dead, cause of death? _______________________________________________

g. How often does entanglement happen (on average)? _________________ w/m/y

h. How often have you had a porpoise in your fishing equipment

in the last month? ________________________

In the last year? ________________________

In the last 5 years? ________________________

**[EXTRA SPACE FOR MULTIPLE ENTANGLEMENT OBSERVATIONS]**

**YOU / FRIEND OR OTHER FISHER [delete as necessary]**

a. Which equipment? ______________________________________________________

b. Where? _____________________________________________________

c. **DATE** & Time of year/month? _________________________________________________

d. Alive and well, injured or dead? _______________________________________________

e. If injured, in what way? _______________________________________________________

f. If dead, cause of death? _______________________________________________________

**YOU / FRIEND OR OTHER FISHER [delete as necessary]**

a. Which equipment? __________________________________________________________

b. Where? _______________________________________________________

c. **DATE** & Time of year/month? _________________________________________________

d. Alive and well, injured or dead? ________________________________________________

e. If injured, in what way? _______________________________________________________

f. If dead, cause of death? _______________________________________________________

1. Do the porpoise get **caught in fishing equipment** more at a certain times of year? **YES / NO**

If **YES** a. When (give months): _________________________________________________

b. What type of equipment? _____________________________________________

c. Why at this time of year? ______________________________________________

1. What do you do if you ever get a porpoise caught in your fishing equipment?

______________________________________________________________________________

1. What do you think is the main cause of porpoise decline?

[**Do not read out answers** **or show answers** **to interviewee** – just tick all of those that are mentioned by interviewee]

Mortality caused by fishing gear

Electric

Rolling hook

Nets (all)

Other _____________________

Decline of fish stocks due to dam projects

Decline of fish stocks due to overfishing

Loss/degradation of fish spawning habitat

Environmental effects caused by TGD

Direct mortality caused by dredging activities

Habitat degradation caused by dredging

Direct mortality caused by ship/propeller collisions

Effects of pollution

Habitat loss/degradation of porpoise habitat

Impacts of noise pollution e.g. can’t find food

Other (Please state): _________________________________________________________

Don’t know

***INCOME***

1. What is your annual income from fishing? (Try to get amount first. If you can’t, ask for %)

***Last year (2015)*** *__________________*¥/year **OR** __________%

***5 years ago (2010)***  *__________________*¥/year **OR** __________%

***10 years ago (2005)*** *__________________*¥/year **OR** __________%

1. Is fishing your sole source of income? **YES / NO**

If **NO**, what is your income from other work? (Try to get amount first. If you can’t, ask for %)

***Last year (2015)*** *__________________*¥/year **OR** __________%

***5 years ago (2010)*** *__________________*¥/year **OR** __________%

***10 years ago (2005)*** *__________________*¥/year **OR** __________%

If **NO, What** other job(s) do you do? ________________________________________

If **NO, When** do you do other work (sometimes evening, or concurrent with fishing work)? _________________________________________________________________________

If **NO**, Is this in specific months? (give months) ________________________________

1. Has your income been fairly stable over the last 5 years? **YES / NO**

If **NO** Why? _________________________________________________________________

1. How much money do you spend every year on the following?

Boat and boat upkeep : _____________________ ¥/yr

Fuel : _____________________ ¥/yr

Fishing equipment (nets etc.) : _____________________ ¥/yr

1. Do you receive money from the government for a reimbursement scheme?
   1. How much/year: ________________ ¥
   2. What for? Fuel Fishing ban Other (state): ________________
   3. How many years have you been receiving this? (get a year): _____________
2. Do you keep any records of your landings and/or earnings? **YES / NO**

If **YES** Can we see the records? **YES / NO**

**PLEASE STATE: If you choose to show us your records, they will be kept anonymous.**

1. Do you think stocks of the following fish species are:
   1. Stable, Increasing or Decreasing?
   2. Healthy or Depleted?

1. How much of the following species did you catch per day in 2015, 5 years ago (2010), and 10 years ago (2005)?

**34 a 34 b 34 c**

***Stable Incr Decr Healthy Depleted 2015 5 years ago (2010) 10 years ago (2005) DK***

a) Crucian carp *Carassius carassius* (jiyu) _______ kg/g _______ kg/g _______ kg/g

b) Common carp *Cyprinus carpio* (liyu) _______ kg/g _______ kg/g _______ kg/g

c) Yellowhead catfish *Pelteobagrus fulvidraco* (huangsangyu) _______ kg/g _______ kg/g _______ kg/g

d) Xenocypris davidi(huangweigu) _______ kg/g _______ kg/g _______ kg/g

e) Sharpbelly *Hemiculter leucisculus* (cantiaoyu) _______ kg/g _______ kg/g _______ kg/g

f) Grenadier anchovy *Coilia ectenes* (daoyu) _______ kg/g _______ kg/g _______ kg/g

g) Ice fish *Hemisalanx prognathus* (yinyu) _______ kg/g _______ kg/g _______ kg/g

h) Needlefish *Hemirhamphus kurumeus* (zhenyu) _______ kg/g _______ kg/g _______ kg/g

I) Reeve’s shad *Tenualosa reevesii* (shiyu) _______ kg/g _______ kg/g _______ kg/g

***FISH STOCKS***

1. Have the **species** of fish you catch changed:
2. In the last 5 years? **YES / NO**

If **YES** How? _______________________________________________________

1. In the last 10 years? **YES / NO**

If **YES** How? _______________________________________________________

1. Are there any factors that you think have negatively affected fish stocks in the Yangtze?

***[DO NOT READ OUT OR SHOW ANSWERS, LET THEM ANSWER ONLY]***

Pollution

Dams ***(ask ->)*** Three Gorges dam Other specific dam: ___________

Habitat modification and loss of spawning grounds etc.

Dredging

People now using a certain type of fishing gear. Specify which type(s) _________________________________________________________________

Other. Please specify _______________________________________________

1. How do you think the **seasonal fishing ban** has affected fish stocks in the Yangtze?

__________________________________________________________________________

*[IF a change has been noted in Q. 37]* When did you notice this change? [give year]

__________________________________________________________________________

1. How do you think the **addition of small fish fry** has affected fish stocks in the Yangtze?

__________________________________________________________________________

*[IF a change has been noted in Q. 38]* When did you notice this change? [give year]

__________________________________________________________________________

1. What do you think the effect of the dams has been on fish stocks in the Yangtze?

________________________________________________________________________

- 1. Specifically, did you notice any effect on fish stocks from the Three Gorges dam?

______________________________________________________________________

- 1. When did you first notice these effects from the TGD? **[get year]**

______________________________________________________________________

- 1. Specifically, did you notice any effect on fish stocks from the Gezhouba dam?

______________________________________________________________________

- 1. When did you first notice these effects from the Gezhouba dam? **[get year]**

______________________________________________________________________

- 1. What about any other dams? (Effects and what year effects were first noticed)

______________________________________________________________________

1. Rate these items in terms of what you think has caused the reduction in fish stocks in the Yangtze and lakes, 1 being has had most effect, to *n* has had least affect:

***[Read or show them all answers]***

_______ Pollution

_______ Dams

_______ Habitat modification causing loss of fish spawning grounds etc.

_______ Overfishing

_______ Building concrete riverbank protection

_______ Other. Please specify: __________________________________________________

1. In the seasons when you’re fishing, what is your overall catch of all species in a day?

Last year (2015): ________________________________________________ kg/jin/day

5 years ago (2010): ______________________________________________ kg/jin/day

10 years ago (2005): _____________________________________________ kg/jin/day

***ELECTROFISHING AND OTHER FISHING TYPES***

1. Do you know anyone else that does electrofishing? **YES / NO**

If **YES** a. **What species of fish** do they catch with it? _______________________

b. **What time of day** do they do it? _______________________

c. How **often** do they do it? __________________d/w/m

d. All year or seasonally? (Write months) _______________________

e. How much of their income comes from electric fishing? ________________(%)

1. Approximately what proportion of this village does electrofishing?

***Now Five years ago Ten years ago***

All All All

More than 50% More than 50% More than 50%

< or = 50% < or = 50% < or = 50%

Less than 25% Less than 25% Less than 25%

Very few Very few Very few

None None None

Don’t know Don’t know Don’t know

Why do you think it has changed? **[DO NOT READ OUT ANSWERS OR LET THEM SEE]**

There’s fewer fish now so electrofishing gives a better yield

Easier/ less effort

Cheaper

No enforcement

Other (specify) __________________________________________

1. What proportion of your village uses hook based fishing?

***Now Five years ago Ten years ago***

All All All

More than 50% More than 50% More than 50%

< or = 50% < or = 50% < or = 50%

Less than 25% Less than 25% Less than 25%

Very few Very few Very few

None None None

Don’t know Don’t know Don’t know

1. Have you ever heard of porpoise getting killed by electrofishing? **YES / NO**

If **YES** a. Where? _________________________________________________________

b. Day or night time? Day Night

c. Any time of year more than another?___________________________________

d. Where the water is shallow or deep? Shallow Deep

e. Are they adult or young porpoises? Adult Calf

***FISHING BAN***

1. Do you do other work during the fishing ban? **YES / NO**If **YES,** what alternative work do you do during the fishing ban? ___________________________________________________________________________

1. Of the fishermen that you know, how many do you think continue fishing during the fishing ban?

All More than 50% Less than or = 50% Less than 25% Very few None

***ALTERNATIVE EMPLOYMENT***

1. If the government offered you alternative employment, would you take it? **YES / NO**

If **YES**, what kind of work would you prefer to do? (Give examples) _______________________

If **YES**, would you need additional training to do the work you would like to do? **YES / NO**

If **YES**, specify type of training: ___________________________________________

1. Would you be willing to relocate to another area to take up alternative employment? **Y / N**

***OTHER***

1. Do you do any night time fishing? **YES / NO**

If **YES**, What type? ______________________________________________________________

If **YES**, How many nights a week? _____ **/7 [do not accept “every day” as an answer]**

1. What proportion of your village does night time fishing? ______________________%
2. Do you know anyone that has been prosecuted for **illegal** fishing? **YES / NO**

If **YES** a. When ___________________________________________________________

b. What type of fishing? ________________________________________________

c. How often do you hear of this happening to someone? ____________d/w/m/y

d. What happened?

Confiscated equipment

Confiscated boat

Fine (¥) How much? ______________ ¥

Fishing licence revoked

Other (please describe) ________________________________________

1. Do you have any other information on porpoises (any sightings or hearing about dead porpoises etc., any currently around here)?

___________________________________________________________________________

1. When was the last time you saw a live Baiji? ______________________________
2. When was the last time you saw a live Reeves paddlefish? _____________________________
3. When was the last time you saw a live Chinese pufferfish? _____________________________

**End Time: __________________**
