# Supplementary material for: Spatiotemporal relationships of threatened cetaceans and anthropogenic threats in the lower Yangtze system
Source: Frontiers journal article supplement (doi:10.3389/fcosc.2022.929959), 2022-11-02
Supplement: Data_Sheet_2.docx [file Data_Sheet_2.docx]

**Supporting Information**

**Table S1.** Details of porpoise and threat survey conducted in Poyang Lake. Section where detour was made along a side-channel is indicated by asterisk.

| **Section** | **Route** | **Winter survey** | | **Summer survey** | |
| --- | --- | --- | --- | --- | --- |
| **Date** | **Distance (km)** | **Date** | **Distance (km)** |
| **North** | Hukou – Xingzi | 1.3.2016 | 41.87 | 12.9.2017 | 40.58 |
| **Central** | Xingzi – Duchang | 2.3.2016 | 34.1 | 13.9.2017 | 34.09 |
| **South** | Duchang – Ruihong | 3.3.2016 | 74.22 | 7.9.2017 | 66.61 |
| **South** | Ruihong – Duchang | 4.3.2016 | 72.82 | 8.9.2017 | 73.75 |
| **Central** | Duchang – Xingzi | 6.3.2016 | 70.83* | 9.9.2017 | 68.42* |
| **North** | Xingzi – Hukou | 7.3.2016 | 41.60 | 10.9.2017 | 40.29 |

**Table S2.** Results of GLMMs investigating income and age as predictors of specific fishing gear type use. Asterisks indicate significant differences at 5% level.

| **Fishing gear type** | **Predictor** | **Effect size** | **Error** | **P value** |
| --- | --- | --- | --- | --- |
| Non-fixed nets | Income | 0.234 | 0.187 | 0.209 |
| Age | -0.019 | 0.017 | 0.257 |
| Fixed nets | Income | 0.237 | 0.179 | 0.184 |
| Age | 0.005 | 0.021 | 0.825 |
| Pots and traps | Income | 0.162 | 0.164 | 0.325 |
| Age | -0.054 | 0.017 | **0.002*** |
| Hook-based gears | Income | 0.350 | 0.201 | 0.082 |
| Age | 0.076 | 0.024 | **0.002*** |
| Electrofishing | Income | 0.044 | 0.248 | 0.858 |
| Age | -0.026 | 0.027 | 0.337 |
| Cormorant fishing | Income | 0.086 | 0.381 | 0.822 |
| Age | 0.050 | 0.035 | 0.155 |


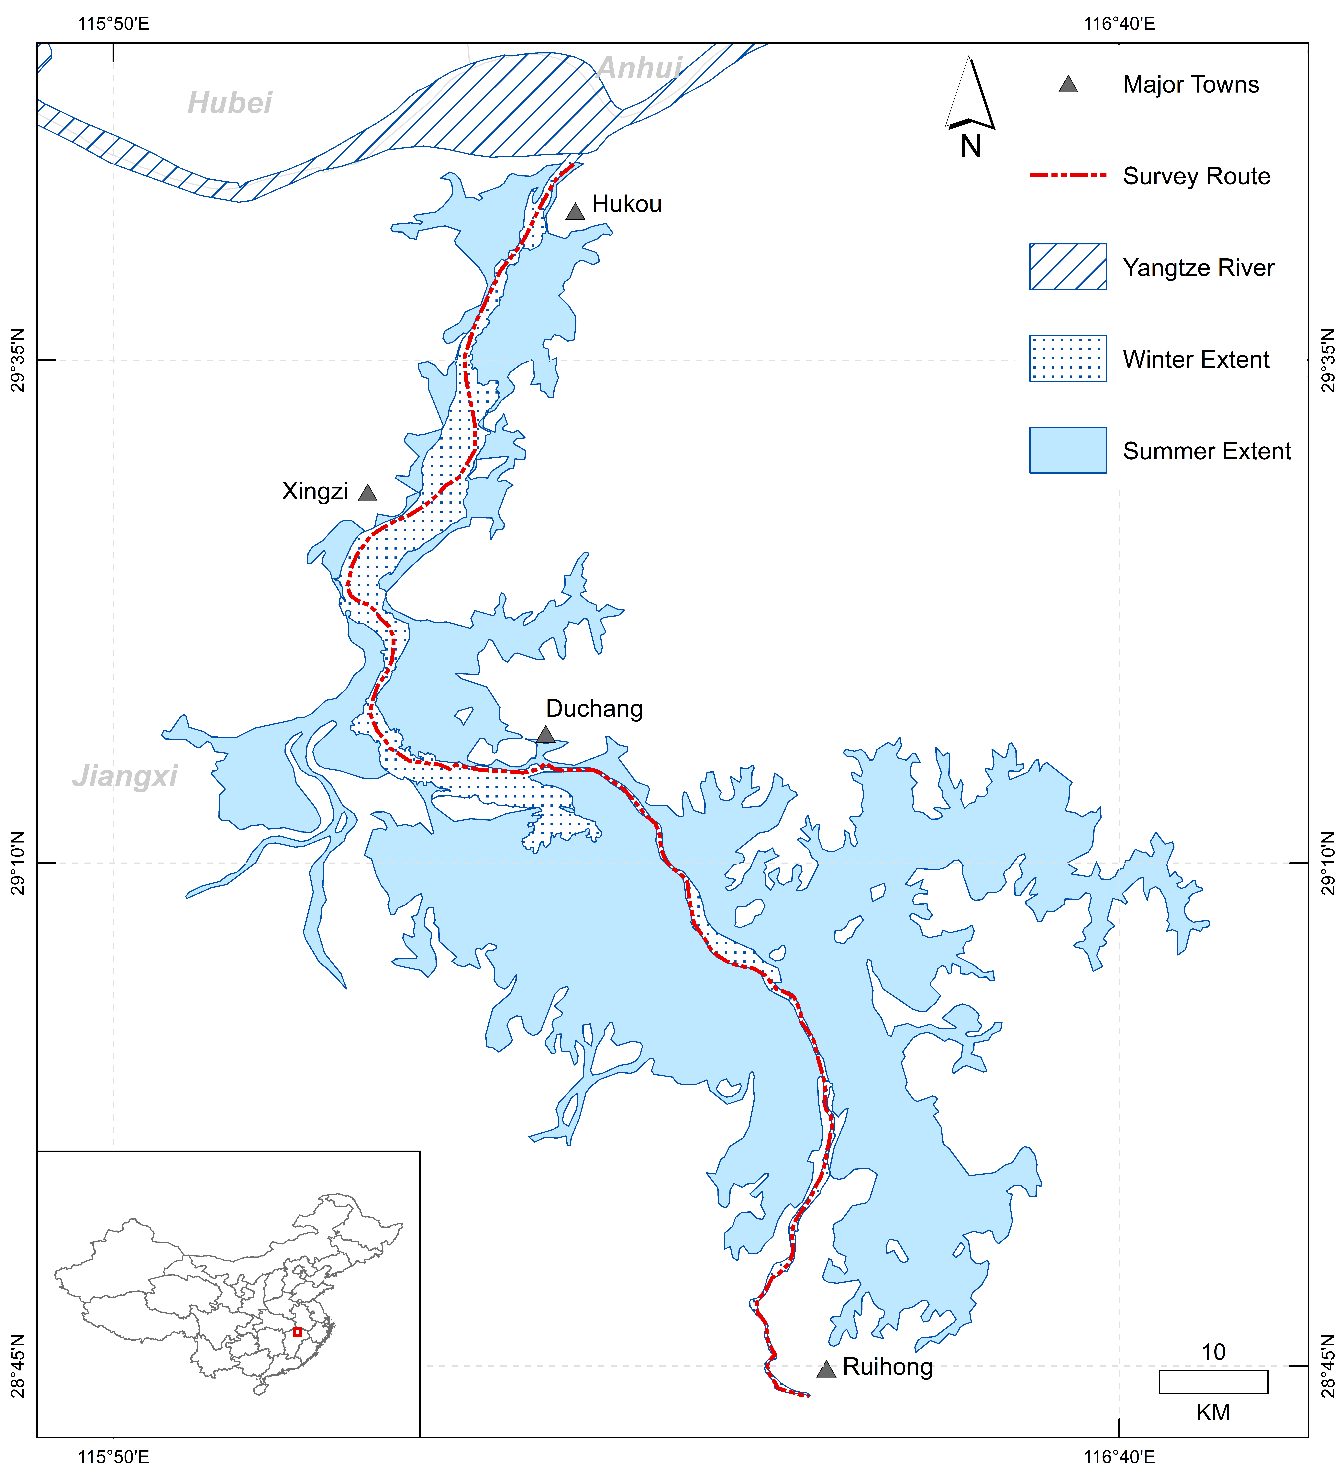


**Figure S1.** Route of visual transect surveys of porpoises and threats in Poyang Lake, showing seasonal differences in winter (low-water) and summer (high-water) lake size.


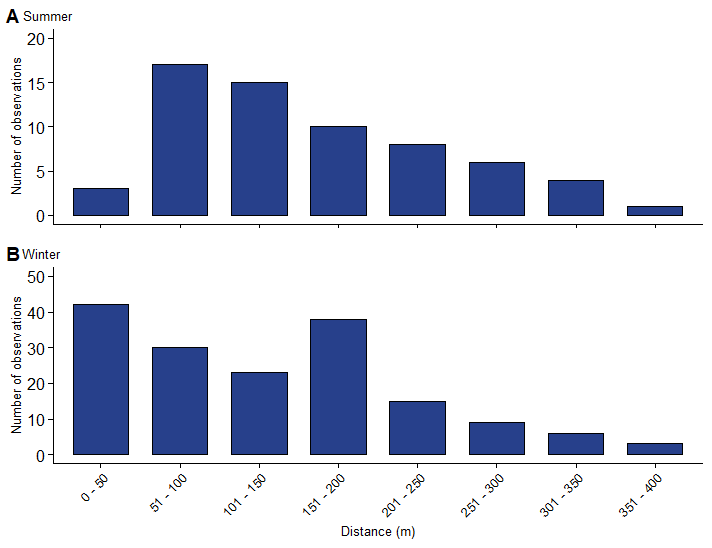


**Figure S2.** Total number of porpoise detections in Poyang Lake at perpendicular distances from survey vessel during: (**A**) summer survey, (**B**) winter survey.


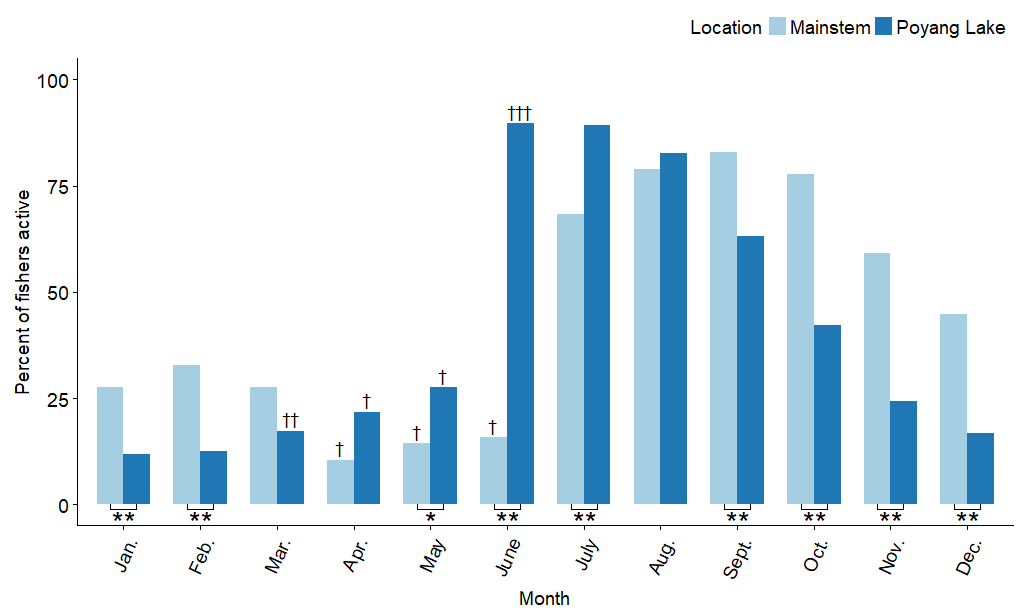


**Figure S3.** Seasonal patterns of fishing activity in the Yangtze mainstem and Poyang Lake, represented by the percentage of fishermen reportedly carrying out fishing activity in each calendar month. Key: † indicates months where fishing is banned for the entire month, †† indicates months where fishing is banned from the 20th of the month onwards, ††† indicates months where fishing is banned up to the 20th of the month. Asterisks indicate significant differences between regions at 5% level (*) and 1% level (**).
